# Supplementary material for: One-dimensional metal thiophosphate nanowires by cluster assembly
Source: Royal Society of Chemistry journal article supplement (doi:10.1039/d2nr03770j), 2022-01-01
Supplement: d2nr03770j1.pdf [file d2nr03770j1.pdf]

## Supplemental Material

### **One-dimensional metal thiophosphate nanowires by cluster assembling**

Chanjuan Shang, Yanyan Zhao, Yan Su, Si Zhou\*, Jijun Zhao

*Key Laboratory of Materials Modification by Laser, Ion and Electron Beams (Dalian University  
of Technology), Ministry of Education, Dalian 116024, China*

---

\*Corresponding author, E-mail: [sizhou@dlut.edu.cn](mailto:sizhou@dlut.edu.cn) (Si Zhou)

## Contents:

Table S1 Band gap (in the unit of eV) of 1D, 2D and bulk  $\text{MPS}_4$  calculated by different methods, including the PBE functional, PBE+ $U$  method ( $U = 3.0$  eV), and HSE06 hybrid functional. For ferromagnets, the band gap of spin-up and spin-down channels are given.

Table S2 Formation energies ( $E_{\text{form}}$ ) of 1D  $\text{MPS}_4$  ( $M =$  transitional metals) nanowires.

Fig. S1 Band structures of  $\text{MPS}_4$  ( $M = \text{Co, Fe and Cr}$ ) nanowires by PBE+ $U$  with  $U = 3.0$  eV,  $U = 5.0$  eV and  $U = 7.0$  eV.

Fig. S2 Phonon dispersions of  $\text{MPS}_4$  ( $M = \text{Al, Ga, In, V, Co, Ni, Mo, Ru, Pd, and Re}$ ) nanowires.

Fig. S3 Energy profile during AIMD simulation for  $\text{MPS}_4$  ( $M = \text{Al, V, Ni and Pd}$ ) nanowires at 300 K. The energy is referred to that of the equilibrium structure of  $\text{MPS}_4$  nanowire at 0 K.

Fig. S4 Band structures of  $\text{MPS}_4$  nanowires for (a)  $M =$  transition metal elements, calculated by the PBE+ $U$  ( $U = 3.0$  eV) method, and (b)  $M =$  group-IIIA elements (B, Al, Ga, In), calculated by the HSE06 functional. The symbol “II” indicate the type-II structure for the nanowire.

Fig. S5 The lowest-energy collinear magnetic order and non-collinear magnetic configurations of selected  $\text{MPS}_4$  nanowires.  $\text{MPS}_4$  ( $M = \text{Mn, Fe, and Co}$ ) nanowires are found to have non-collinear magnetic order, with higher energy by 1.6 ~ 4.8 meV per magnetic atom than those of the collinear ones.

Fig. S6 Band structures of  $\text{PdPS}_4$  nanowire calculated by different methods, (a) PBE+ $U$  with  $U = 3.0$  eV, (b)  $U = 5.0$  eV, (c)  $U = 7.0$  eV, (d) by considering SOC with different densities of  $\mathbf{k}$ -points with  $0.0002 \text{ \AA}^{-1}$ , and (f) ~ (i) by considering different SOC strength (200% ~ 500%) and denser  $\mathbf{k}$ -points with  $0.0001 \text{ \AA}^{-1}$ . The semimetal behavior is robust under different computational methods.

Fig. S7 Band structures of bulk  $\text{MPS}_4$  ( $M = \text{Al, Ga, In}$ ) calculated by the HSE06 functional.

Fig. S8 Band structures of 2D  $\text{MPS}_4$  ( $M = \text{V, Co, Ni, Mo, Ru, Pd, Re}$ ) monolayer calculated by the PBE+  $U$  ( $U = 3.0$  eV) method.

Table S1 Band gap (in the unit of eV) of 1D, 2D and bulk MPS<sub>4</sub> calculated by different methods, including the PBE functional, PBE+*U* method (*U* = 3.0 eV), and HSE06 hybrid functional. For ferromagnets, the band gap of spin-up and spin-down channels are given.

| 1D                |                   |                   | bulk              |                   |                   |                   |                   |                   |
|-------------------|-------------------|-------------------|-------------------|-------------------|-------------------|-------------------|-------------------|-------------------|
|                   | PBE               | HSE06             | PBE               | HSE06             |                   |                   |                   |                   |
| BPS <sub>4</sub>  | 2.37              | 3.57              | 1.97              | 3.21              |                   |                   |                   |                   |
| AlPS <sub>4</sub> | 2.93              | 4.14              | 2.39              | 3.55              |                   |                   |                   |                   |
| GaPS <sub>4</sub> | 2.78              | 4.01              | 2.02              | 3.17              |                   |                   |                   |                   |
| InPS <sub>4</sub> | 2.53              | 3.73              | 1.99              | 3.12              |                   |                   |                   |                   |
| 1D                |                   |                   | 2D                |                   |                   |                   |                   |                   |
|                   | PBE               | PBE+U             | PBE               | PBE+U             |                   |                   |                   |                   |
| VPS <sub>4</sub>  | 0.77              | 0.60              | 0.01              | 0.03              |                   |                   |                   |                   |
| CrPS <sub>4</sub> | 0.97              | 1.15              | 1.00/1.41         | 0.66/1.69         |                   |                   |                   |                   |
| CoPS <sub>4</sub> | 0.76              | 0.81              | 0.87              | 0.71              |                   |                   |                   |                   |
| NiPS <sub>4</sub> | 1.73/0.01         | 1.73/0.22         | --                | --                |                   |                   |                   |                   |
| MoPS <sub>4</sub> | --                | --                | --                | --                |                   |                   |                   |                   |
| RuPS <sub>4</sub> | --                | --                | 0.33              | 0.37              |                   |                   |                   |                   |
| PdPS <sub>4</sub> | 0                 | 0                 | --                | --                |                   |                   |                   |                   |
| RePS <sub>4</sub> | 0.02/metal        | 1.41/metal        | --                | --                |                   |                   |                   |                   |
| 1D                | ScPS <sub>4</sub> | TiPS <sub>4</sub> | MnPS <sub>4</sub> | FePS <sub>4</sub> | YPS <sub>4</sub>  | ZrPS <sub>4</sub> | NbPS <sub>4</sub> | RhPS <sub>4</sub> |
| PBE               | 2.07              | --                | 1.25              | 0.66              | 2.32              | --                | 0.91              | 0.64              |
| PBE+ <i>U</i>     | 2.28              | --                | 1.56              | 1.65              | 0.37              | --                | 1.01              | 0.83              |
|                   | HfPS <sub>4</sub> | TaPS <sub>4</sub> | WPS <sub>4</sub>  | OsPS <sub>4</sub> | IrPS <sub>4</sub> | PtPS <sub>4</sub> |                   |                   |
| PBE               | --                | 1.77              | --                | --                | 0.72              | 0                 |                   |                   |
| PBE+ <i>U</i>     | --                | 1.73              | --                | --                | 0.94              | 0                 |                   |                   |

Table S2 Formation energies ( $E_{\text{form}}$ ) of 1D  $\text{MPS}_4$  (M = transitional metals) nanowires.

| $3d$              | $E_{\text{form}}$ (eV) | $4d$              | $E_{\text{form}}$ (eV) | $5d$              | $E_{\text{form}}$ (eV) |
|-------------------|------------------------|-------------------|------------------------|-------------------|------------------------|
| ScPS <sub>4</sub> | -3.77                  | YPS <sub>4</sub>  | -3.89                  | --                | --                     |
| TiPS <sub>4</sub> | -2.19                  | ZrPS <sub>4</sub> | -2.43                  | HfPS <sub>4</sub> | -2.45                  |
| VPS <sub>4</sub>  | -1.21                  | NbPS <sub>4</sub> | -1.59                  | TaPS <sub>4</sub> | -1.46                  |
| CrPS <sub>4</sub> | -1.44                  | MoPS <sub>4</sub> | 0.13                   | WPS <sub>4</sub>  | 0.63                   |
| MnPS <sub>4</sub> | -1.15                  | --                | --                     | RePS <sub>4</sub> | 1.06                   |
| FePS <sub>4</sub> | -3.04                  | RuPS <sub>4</sub> | 0.69                   | OsPS <sub>4</sub> | 1.28                   |
| CoPS <sub>4</sub> | -0.16                  | RhPS <sub>4</sub> | 0.25                   | IrPS <sub>4</sub> | 0.69                   |
| NiPS <sub>4</sub> | -0.08                  | PdPS <sub>4</sub> | 0.06                   | PtPS <sub>4</sub> | -0.10                  |

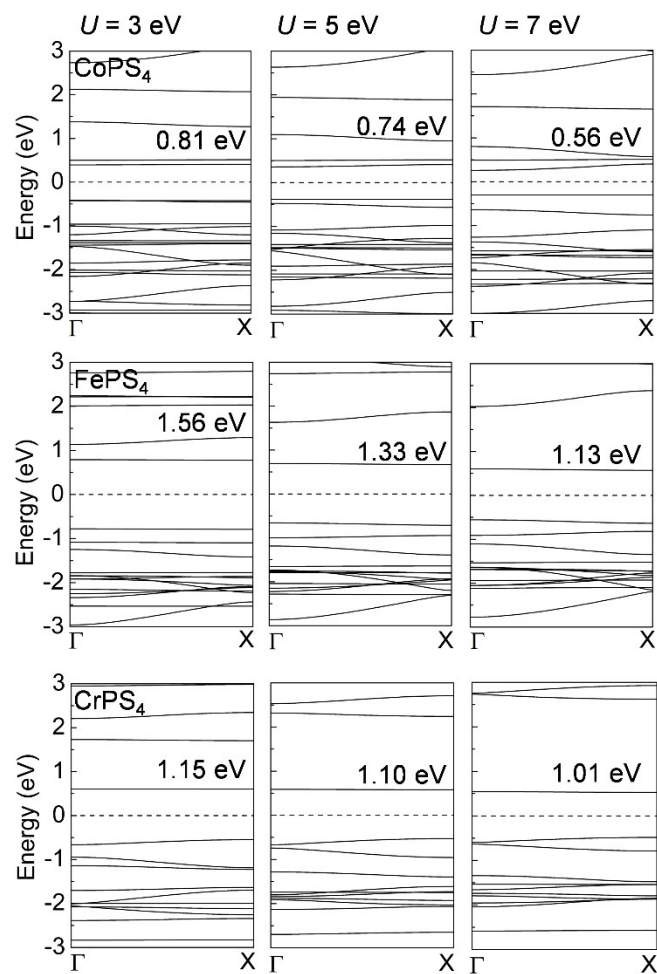

Fig. S1 Band structures of MPS<sub>4</sub> (M = Co, Fe and Cr) nanowires by PBE+ $U$  with  $U = 3.0 \text{ eV}$ ,  $U = 5.0 \text{ eV}$  and  $U = 7.0 \text{ eV}$ .

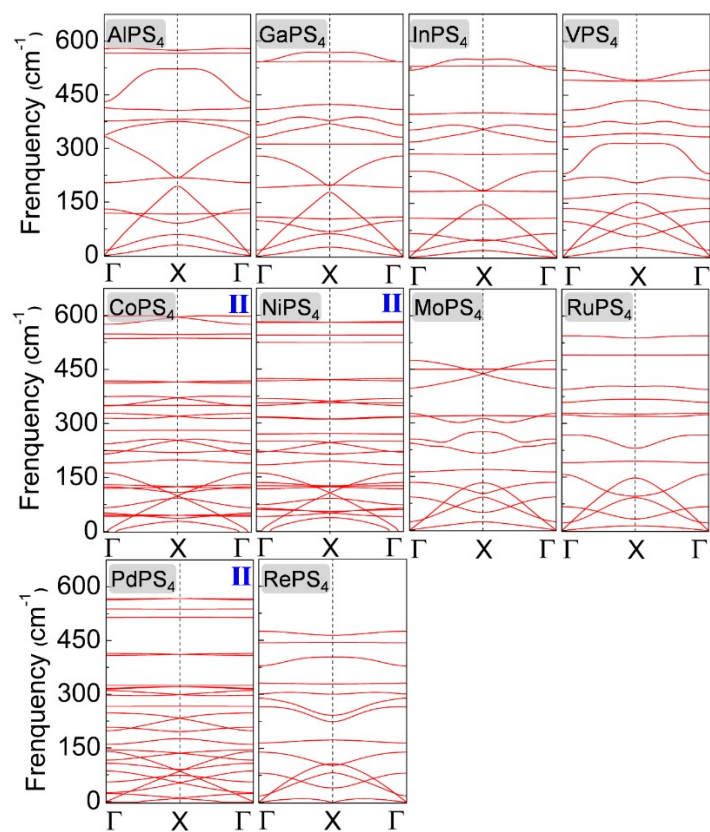

Fig. S2 Band structures of  $MPS_4$  ( $M = \text{Al, Ga, In, V, Co, Ni, Mo, Ru, Pd, and Re}$ ) nanowires.

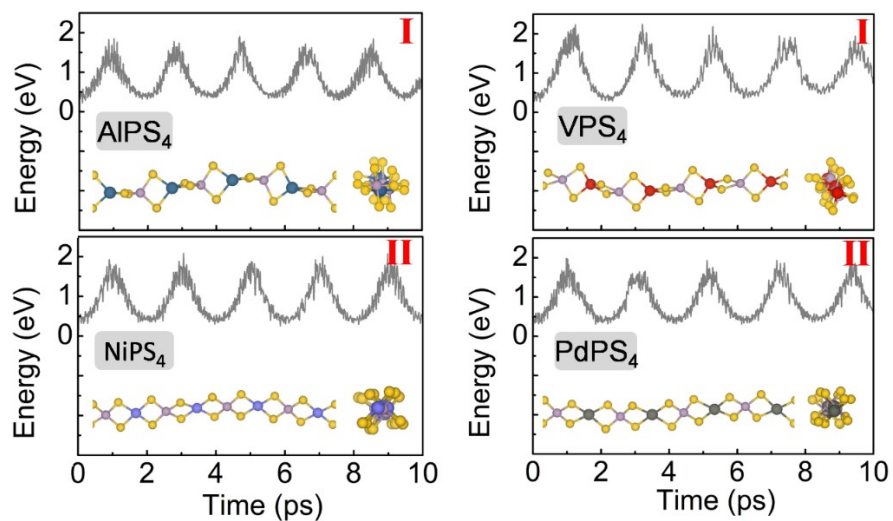

Fig. S3 Energy profile during AIMD simulation for MPS<sub>4</sub> (M = Al, V, Ni and Pd) nanowires at 300 K. The energy is referred to that of the equilibrium structure of MPS<sub>4</sub> nanowire at 0 K.

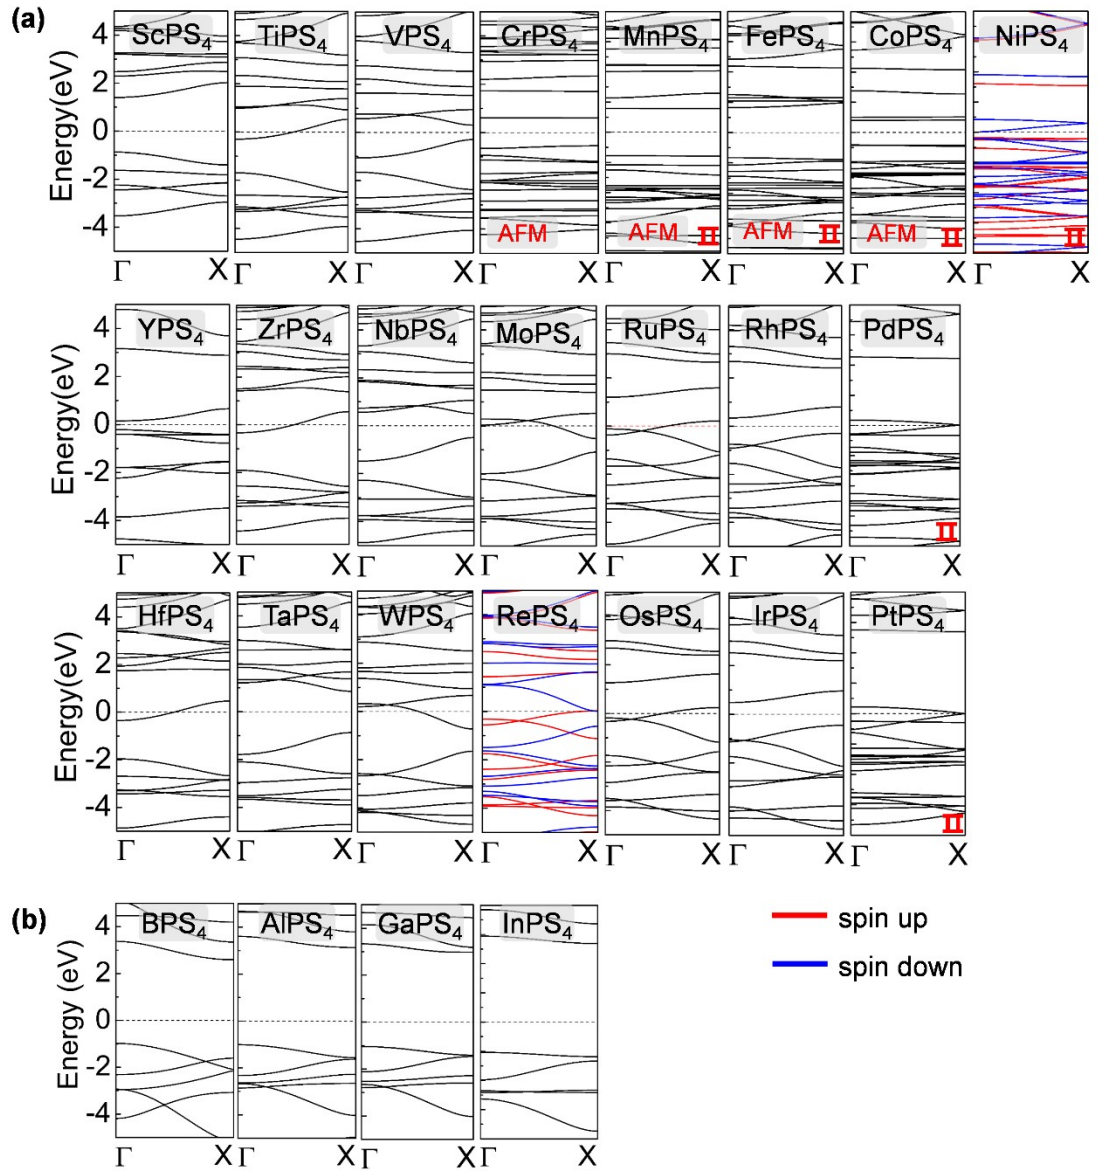

Fig. S4 Band structures of  $MPS_4$  nanowires for (a)  $M$  = transition metal elements, calculated by the PBE+ $U$  ( $U = 3.0$  eV) method, and (b)  $M$  = group-III A elements (B, Al, Ga, In), calculated by the HSE06 functional. The symbol “II” indicate the type-II structure for the nanowire.



|                   |  collinear | non-collinear                                                                      | $E$ (meV) |
|-------------------|---------------------------------------------------------------------------------------------|------------------------------------------------------------------------------------|-----------|
| MnPS <sub>4</sub> |            |  | 4.8       |
| FePS <sub>4</sub> |            |  | 2.0       |
| CoPS <sub>4</sub> |            |  | 1.6       |

Fig. S5 The lowest-energy collinear magnetic order and non-collinear magnetic configurations of selected MPS<sub>4</sub> nanowires. MPS<sub>4</sub> (M = Mn, Fe, and Co) nanowires are found to have non-collinear magnetic order, with higher energy by 1.6 ~ 4.8 meV per magnetic atom than those of the collinear ones.

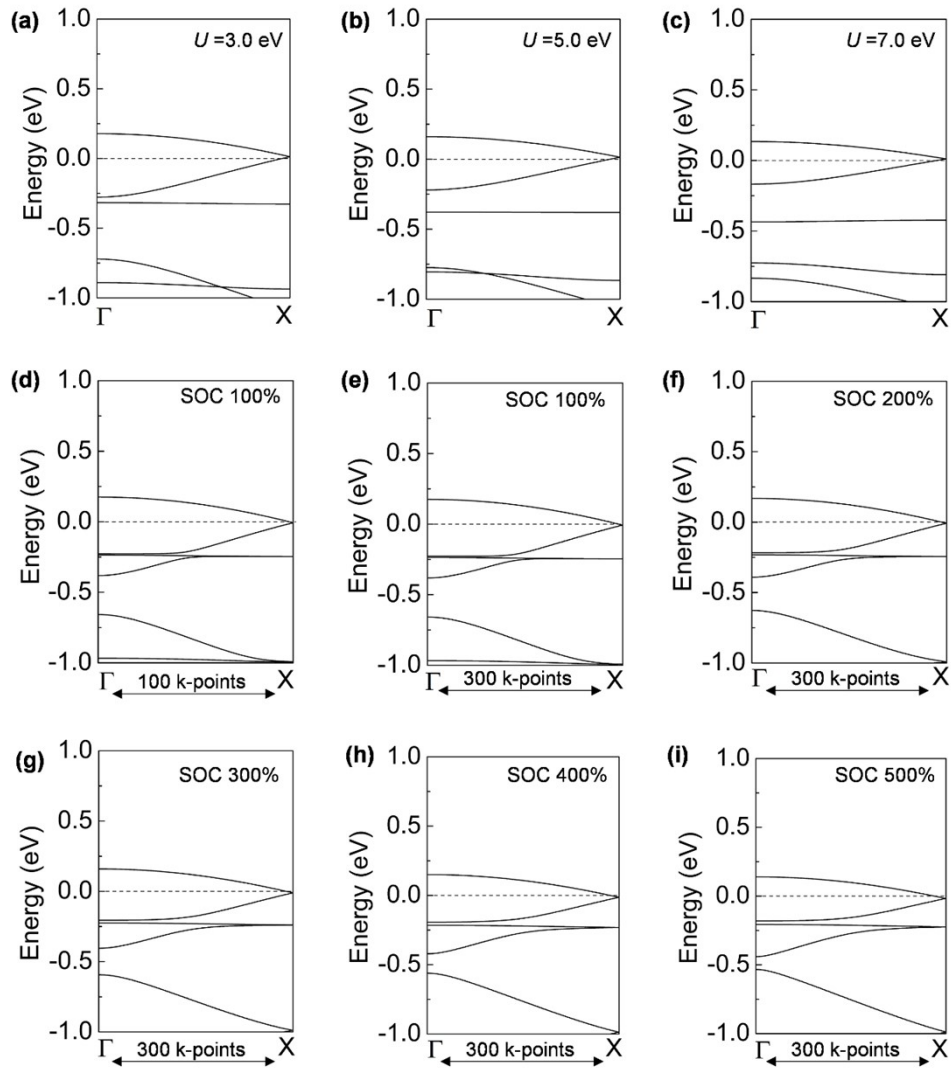

Fig. S6 Band structures of PdPS<sub>4</sub> nanowire calculated by different methods, (a) PBE+ $U$  with  $U = 3.0$  eV, (b)  $U = 5.0$  eV, (c)  $U = 7.0$  eV, (d) by considering SOC with different densities of  $\mathbf{k}$ -points with  $0.0002 \text{ \AA}^{-1}$ , and (f) ~ (i) by considering different SOC strength (200% ~ 500%) and denser  $\mathbf{k}$ -points with  $0.0001 \text{ \AA}^{-1}$ . The semimetal behavior is robust under different computational methods.

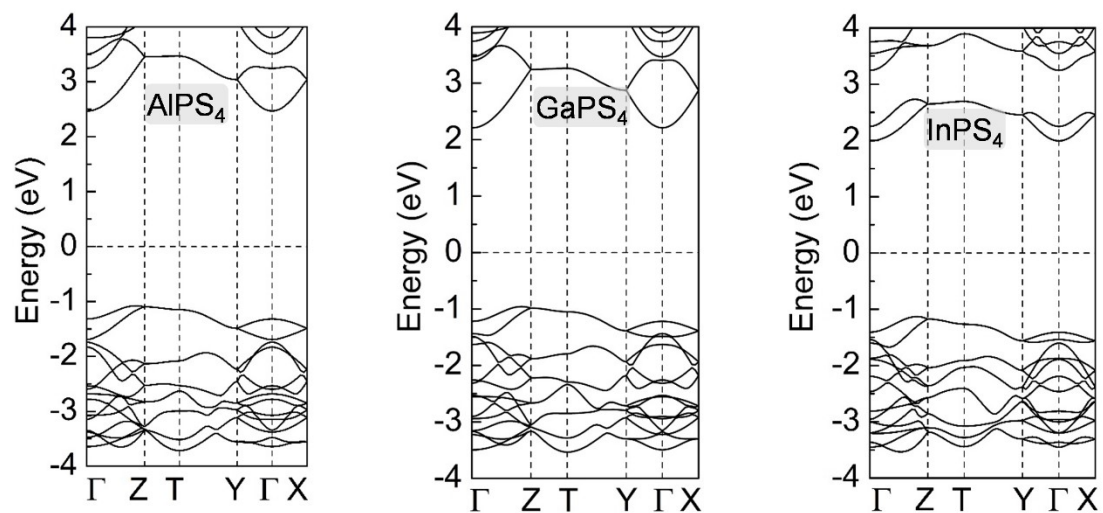

Fig. S7 Band structures of bulk  $MPS_4$  ( $M = Al, Ga, In$ ) calculated by the HSE06 functional.

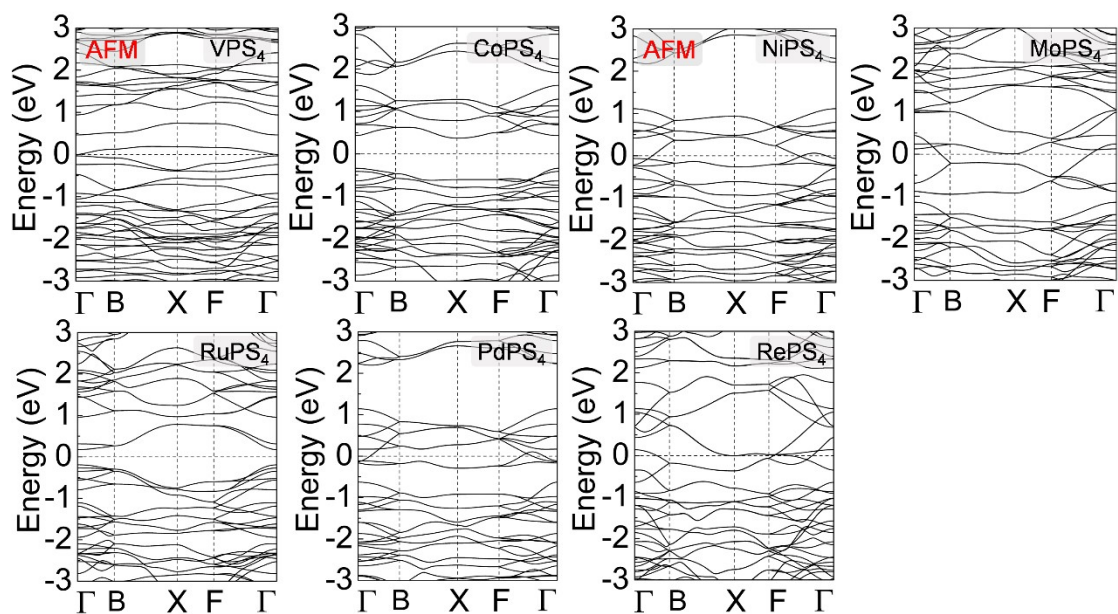

Fig. S8 Band structures of 2D MPS<sub>4</sub> (M = V, Co, Ni, Mo, Ru, Pd, Re) monolayer calculated by the PBE+  $U$  ( $U = 3.0$  eV) method.
